# Supplementary material
Source: MDPI journal article supplement (https://www.mdpi.com/2312-7481/7/4/54)

# checkCIF/PLATON report

You have not supplied any structure factors. As a result the full set of tests cannot be run.

THIS REPORT IS FOR GUIDANCE ONLY. IF USED AS PART OF A REVIEW PROCEDURE FOR PUBLICATION, IT SHOULD NOT REPLACE THE EXPERTISE OF AN EXPERIENCED CRYSTALLOGRAPHIC REFEREE.

No syntax errors found.      CIF dictionary      Interpreting this report

## Datablock: c313

---

|                 |                           |                               |
|-----------------|---------------------------|-------------------------------|
| Bond precision: | C-C = 0.0088 A            | Wavelength=0.71070            |
| Cell:           | a=35.837(2)               | b=7.9677(5)      c=10.8502(7) |
|                 | alpha=90                  | beta=99.028(9)      gamma=90  |
| Temperature:    | 100 K                     |                               |
|                 | Calculated                | Reported                      |
| Volume          | 3059.8(3)                 | 3059.8(3)                     |
| Space group     | C 2/c                     | C2/c                          |
| Hall group      | -C 2yc                    | ?                             |
| Moiety formula  | F6 O4.80 Re, 4(C10 H8 S8) | ?                             |
| Sum formula     | C40 H32 F6 O4.80 Re S32   | C40 H32 F6 O4.80 Re S32       |
| Mr              | 1915.59                   | 1915.58                       |
| Dx,g cm-3       | 2.079                     | 2.079                         |
| Z               | 2                         | 2                             |
| Mu (mm-1)       | 3.142                     | 3.142                         |
| F000            | 1902.8                    | 1903.0                        |
| F000'           | 1909.25                   |                               |
| h,k,lmax        | 44,9,13                   | 44,9,13                       |
| Nref            | 3032                      | 3028                          |
| Tmin,Tmax       | 0.475,0.730               | 0.318,1.000                   |
| Tmin'           | 0.451                     |                               |

Correction method= # Reported T Limits: Tmin=0.318 Tmax=1.000  
AbsCorr = MULTI-SCAN

Data completeness= 0.999      Theta(max)= 26.070

R(reflections)= 0.0702( 2616)      wR2(reflections)= 0.1947( 3028)

S = 1.005      Npar= 207

---

The following ALERTS were generated. Each ALERT has the format

**test-name\_ALERT\_alert-type\_alert-level.**

Click on the hyperlinks for more details of the test.

---

**Alert level C**

PLAT077\_ALERT\_4\_C Unitcell Contains Non-integer Number of Atoms .. Please Check  
PLAT342\_ALERT\_3\_C Low Bond Precision on C-C Bonds ..... 0.0088 Ang.

---

**Alert level G**

PLAT002\_ALERT\_2\_G Number of Distance or Angle Restraints on AtSite 7 Note  
PLAT003\_ALERT\_2\_G Number of Uiso or Uij Restrained non-H Atoms ... 1 Report  
PLAT005\_ALERT\_5\_G No Embedded Refinement Details Found in the CIF Please Do !  
PLAT068\_ALERT\_1\_G Reported F000 Differs from Calcd (or Missing)... Please Check  
PLAT072\_ALERT\_2\_G SHELXL First Parameter in WGHT Unusually Large 0.10 Report  
PLAT083\_ALERT\_2\_G SHELXL Second Parameter in WGHT Unusually Large 59.58 Why ?  
PLAT093\_ALERT\_1\_G No s.u.'s on H-positions, Refinement Reported as mixed Check  
PLAT128\_ALERT\_4\_G Alternate Setting for Input Space Group C2/c I2/a Note  
PLAT300\_ALERT\_4\_G Atom Site Occupancy of Re1 Constrained at 0.25 Check  
PLAT300\_ALERT\_4\_G Atom Site Occupancy of Ow1 Constrained at 0.72 Check  
PLAT300\_ALERT\_4\_G Atom Site Occupancy of F1 Constrained at 0.25 Check  
PLAT300\_ALERT\_4\_G Atom Site Occupancy of F2 Constrained at 0.25 Check  
PLAT300\_ALERT\_4\_G Atom Site Occupancy of F3 Constrained at 0.25 Check  
PLAT300\_ALERT\_4\_G Atom Site Occupancy of F4 Constrained at 0.25 Check  
PLAT300\_ALERT\_4\_G Atom Site Occupancy of F5 Constrained at 0.25 Check  
PLAT300\_ALERT\_4\_G Atom Site Occupancy of F6 Constrained at 0.25 Check  
PLAT300\_ALERT\_4\_G Atom Site Occupancy of Ow2 Constrained at 0.48 Check  
PLAT300\_ALERT\_4\_G Atom Site Occupancy of Ow3 Constrained at 0.24 Check  
PLAT301\_ALERT\_3\_G Main Residue Disorder .....(Resd 1 ) 100% Note  
PLAT304\_ALERT\_4\_G Non-Integer Number of Atoms in ..... (Resd 1 ) 5.90 Check  
PLAT311\_ALERT\_2\_G Isolated Disordered Oxygen Atom (No H's ?) ..... Ow2 Check  
PLAT720\_ALERT\_4\_G Number of Unusual/Non-Standard Labels ..... 3 Note  
PLAT764\_ALERT\_4\_G Overcomplete CIF Bond List Detected (Rep/Expd) . 1.29 Ratio  
PLAT779\_ALERT\_4\_G Suspect or Irrelevant (Bond) Angle(s) in CIF . # 68 Check  
OW1 -F4 -OW3 1.555 1.555 1.555 36.90 Deg.  
PLAT779\_ALERT\_4\_G Suspect or Irrelevant (Bond) Angle(s) in CIF . # 69 Check  
OW1 -F4 -RE1 1.555 1.555 1.555 24.20 Deg.  
PLAT779\_ALERT\_4\_G Suspect or Irrelevant (Bond) Angle(s) in CIF . # 73 Check  
OW1 -F5 -OW2 1.555 1.555 1.555 33.10 Deg.  
PLAT779\_ALERT\_4\_G Suspect or Irrelevant (Bond) Angle(s) in CIF . # 75 Check  
OW1 -F5 -RE1 1.555 1.555 1.555 17.50 Deg.  
PLAT779\_ALERT\_4\_G Suspect or Irrelevant (Bond) Angle(s) in CIF . # 76 Check  
OW2 -F5 -RE1 1.555 1.555 1.555 25.90 Deg.  
PLAT779\_ALERT\_4\_G Suspect or Irrelevant (Bond) Angle(s) in CIF . # 77 Check  
OW2 -F2 -RE1 1.555 1.555 1.555 26.10 Deg.  
PLAT779\_ALERT\_4\_G Suspect or Irrelevant (Bond) Angle(s) in CIF . # 78 Check  
OW2 -F6 -RE1 1.555 1.555 1.555 20.40 Deg.  
PLAT779\_ALERT\_4\_G Suspect or Irrelevant (Bond) Angle(s) in CIF . # 119 Check  
OW1 -OW2 -F5 1.555 1.555 1.555 43.40 Deg.  
PLAT779\_ALERT\_4\_G Suspect or Irrelevant (Bond) Angle(s) in CIF . # 121 Check  
F6 -OW2 -F5 2.556 1.555 1.555 33.50 Deg.  
PLAT779\_ALERT\_4\_G Suspect or Irrelevant (Bond) Angle(s) in CIF . # 128 Check  
OW1 -OW2 -F5 2.556 1.555 2.556 43.40 Deg.  
PLAT779\_ALERT\_4\_G Suspect or Irrelevant (Bond) Angle(s) in CIF . # 130 Check  
F6 -OW2 -F5 1.555 1.555 2.556 33.50 Deg.  
PLAT779\_ALERT\_4\_G Suspect or Irrelevant (Bond) Angle(s) in CIF . # 135 Check  
OW1 -OW3 -RE1 1.555 1.555 1.555 23.40 Deg.  
PLAT789\_ALERT\_4\_G Atoms with Negative \_atom\_site\_disorder\_group # 9 Check  
PLAT860\_ALERT\_3\_G Number of Least-Squares Restraints ..... 18 Note  
PLAT899\_ALERT\_4\_G SHELXL97 is Deprecated and Succeeded by SHELXL/ 2018 Note

---

0 **ALERT level A** = Most likely a serious problem - resolve or explain  
0 **ALERT level B** = A potentially serious problem, consider carefully  
2 **ALERT level C** = Check. Ensure it is not caused by an omission or oversight

38 **ALERT level G** = General information/check it is not something unexpected

2 ALERT type 1 CIF construction/syntax error, inconsistent or missing data  
5 ALERT type 2 Indicator that the structure model may be wrong or deficient  
3 ALERT type 3 Indicator that the structure quality may be low  
29 ALERT type 4 Improvement, methodology, query or suggestion  
1 ALERT type 5 Informative message, check

---

It is advisable to attempt to resolve as many as possible of the alerts in all categories. Often the minor alerts point to easily fixed oversights, errors and omissions in your CIF or refinement strategy, so attention to these fine details can be worthwhile. In order to resolve some of the more serious problems it may be necessary to carry out additional measurements or structure refinements. However, the purpose of your study may justify the reported deviations and the more serious of these should normally be commented upon in the discussion or experimental section of a paper or in the "special\_details" fields of the CIF. checkCIF was carefully designed to identify outliers and unusual parameters, but every test has its limitations and alerts that are not important in a particular case may appear. Conversely, the absence of alerts does not guarantee there are no aspects of the results needing attention. It is up to the individual to critically assess their own results and, if necessary, seek expert advice.

### **Publication of your CIF in IUCr journals**

A basic structural check has been run on your CIF. These basic checks will be run on all CIFs submitted for publication in IUCr journals (*Acta Crystallographica*, *Journal of Applied Crystallography*, *Journal of Synchrotron Radiation*); however, if you intend to submit to *Acta Crystallographica Section C* or *E* or *IUCrData*, you should make sure that full publication checks are run on the final version of your CIF prior to submission.

### **Publication of your CIF in other journals**

Please refer to the *Notes for Authors* of the relevant journal for any special instructions relating to CIF submission.

---

**PLATON version of 18/09/2020; check.def file version of 20/08/2020**

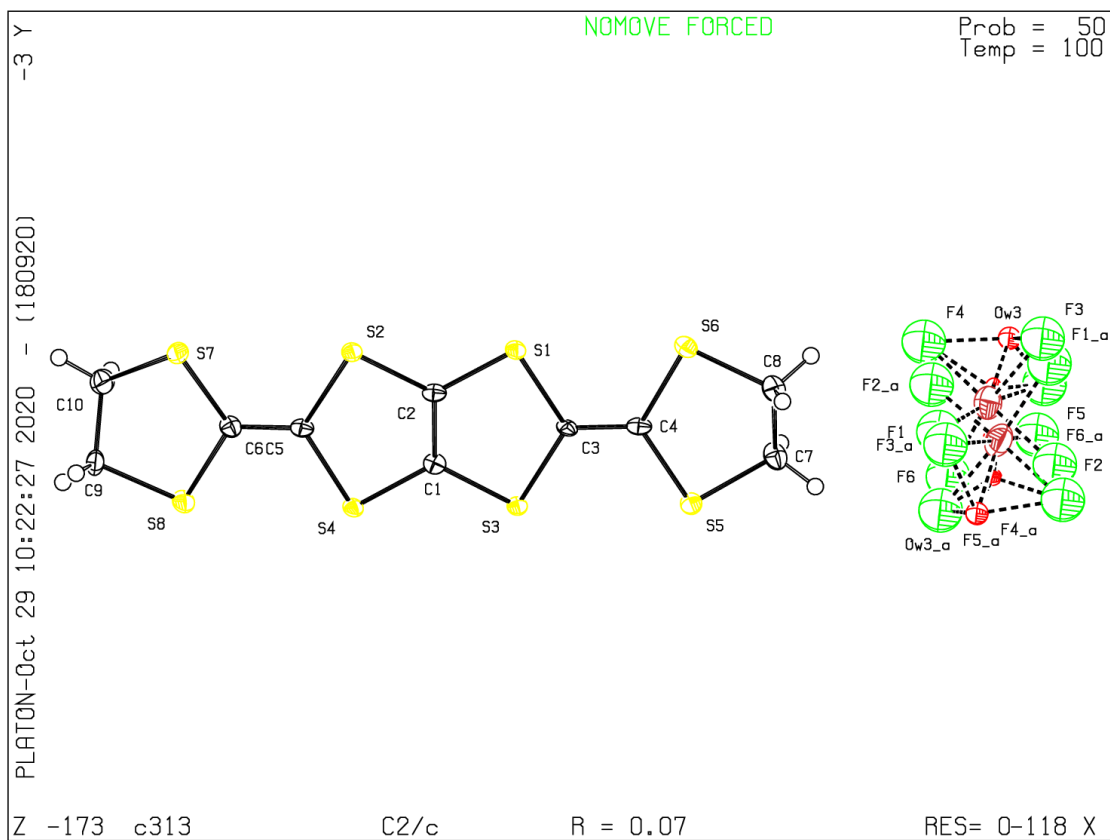

Supplement: s1 [file s1]
