# Supplementary material
Source: MDPI journal article supplement (https://www.mdpi.com/2312-7481/7/4/54)
Supplement: s1 [file s1]

## **New radical cation salts based on BDH-TTP donor: two stable molecular metals with a magnetic anion $[\text{ReF}_6]^{2-}$ and a semiconductor with an anion $[\text{ReO}_4]^-$**

Nataliya D. Kushch <sup>1,\*</sup>, Gennady V. Shilov <sup>1</sup>, Lev. I. Buravov <sup>1</sup>, Eduard B. Yagubskii <sup>1,\*</sup>, Vladimir N. Zverev <sup>2,3</sup>, Enric Canadell <sup>4</sup>, J. Yamada.<sup>5</sup>

1. Institute of Problems of Chemical Physics RAS, 142432, Chernogolovka, MD, Russia, e-mail: kushch@icp.ac.ru, shilg@icp.ac.ru; buravov@icp.ac.ru; yagubski@gmail.com;
2. Institute of Solid State Physics, Russian Academy of Sciences, Chernogolovka, Moscow region, 142432, Russia, e-mail: zverev@issp.ac.ru;
3. Moscow Institute of Physics and Technology, Dolgoprudnyi, 141700, Moscow region, Russia, e-mail: zverev@issp.ac.ru;
4. Institut de Ciència de Materials de Barcelona (ICMAB-CSIC), Campus de la U.A.B., E-08193 Bellaterra, Spain, e-mail: canadell@icmab.es
5. Department of Material Science, Graduate School of Material Science, University of Hyogo, 3-2-1 Kyoto, Kamigori-cho Ako-gun, Hyogo 678-1297, Japan, e-mail: yamada@sci.u-hyogo.ac.jp.

## 1. X-ray Crystallography

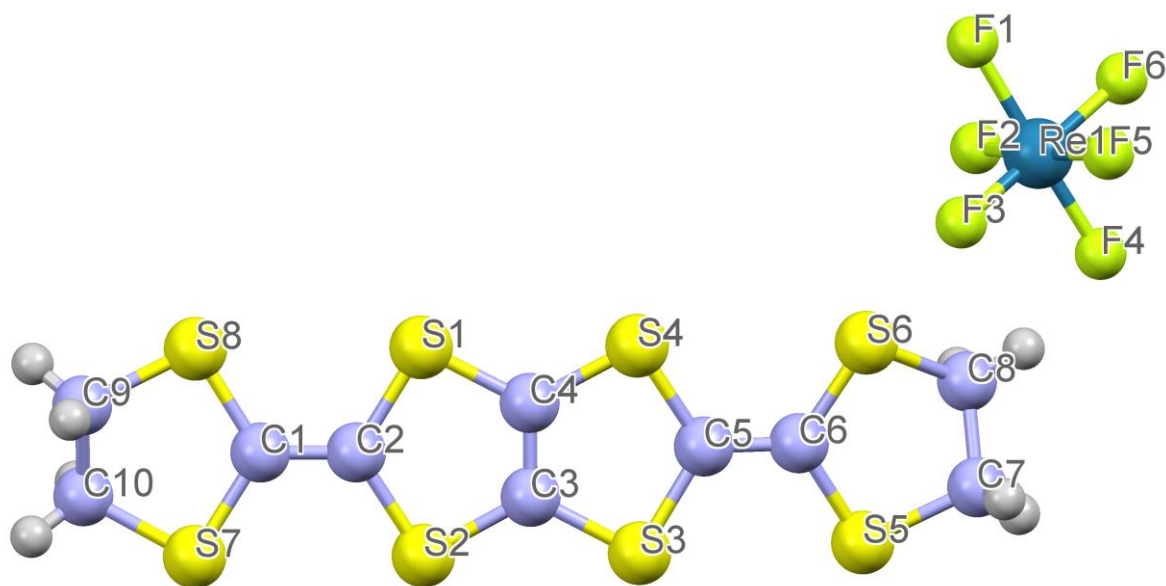

**Figure S1.** Asymmetric unit and the designations of the radical cation and anion in the crystals  $\kappa$ -(BDH-TTP)<sub>4</sub>ReF<sub>6</sub> salt (**1**).

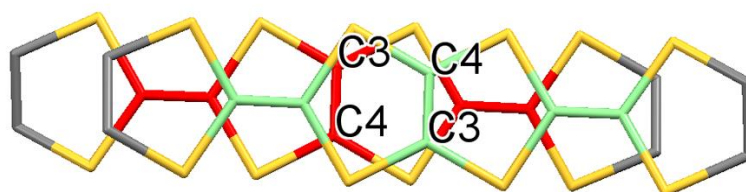

**Figure S2.** Mutual arrangement of the radical cations in the dimer and the designations of central C=C bond in the molecules  $\kappa$ -(BDH-TTP)<sub>4</sub>ReF<sub>6</sub> salt (**1**).

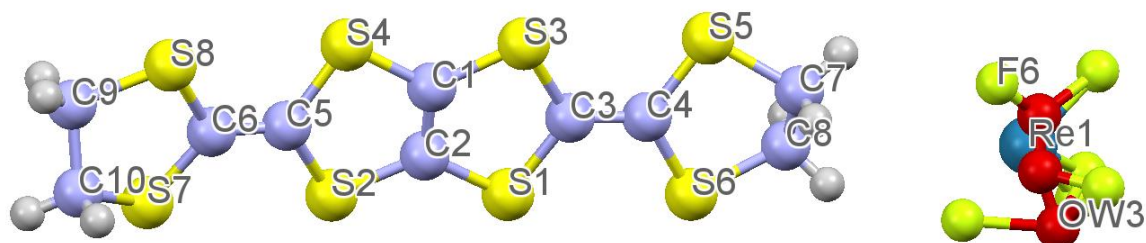

**Figure S3.** Asymmetric unit and the designations of the radical cation and anion in the crystals  $\kappa$ -(BDH-TTP)<sub>4</sub>ReF<sub>6</sub>·4.8H<sub>2</sub>O (**2**).

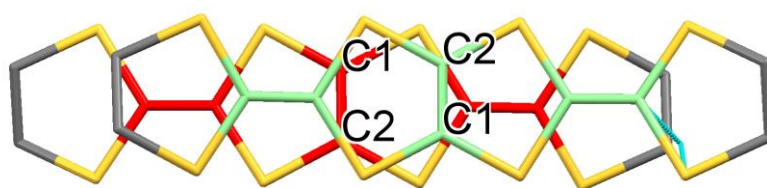

**Figure S4.** Mutual arrangement of the radical cations in the dimer and the designations of central C=C bond in the molecules  $\kappa$ -(BDH-TTP)<sub>4</sub>ReF<sub>6</sub>·4.8H<sub>2</sub>O salt (**2**).

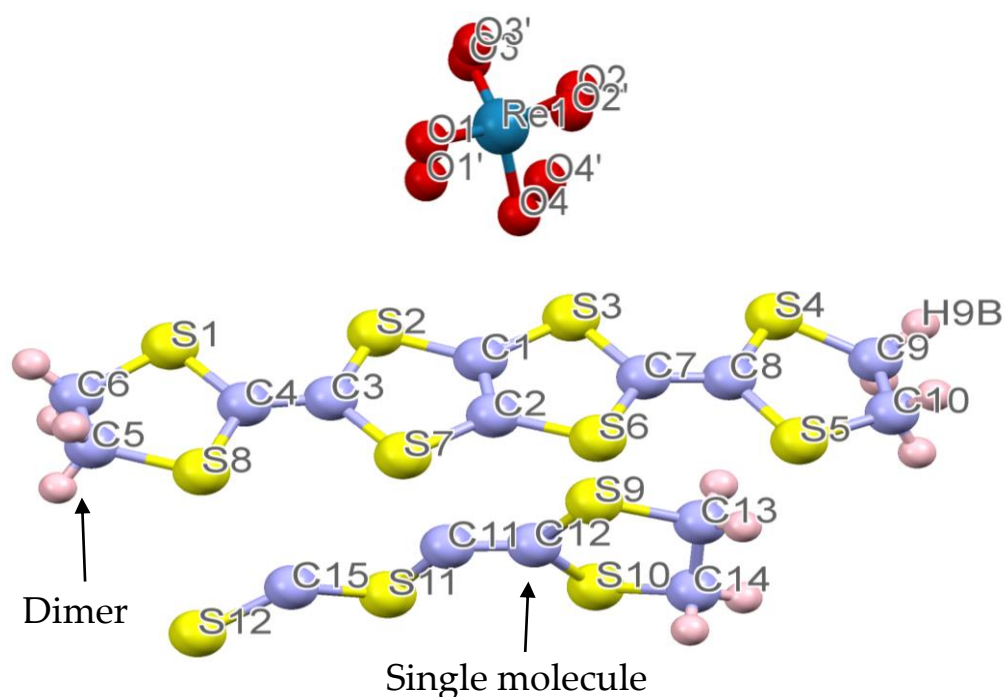

**Figure S5.** Asymmetric unit and the designations of the radical cations and anion in the crystals pseudo- $\kappa''$ -(BDH-TTP)<sub>3</sub>(ReO<sub>4</sub>)<sub>2</sub> (**3**).

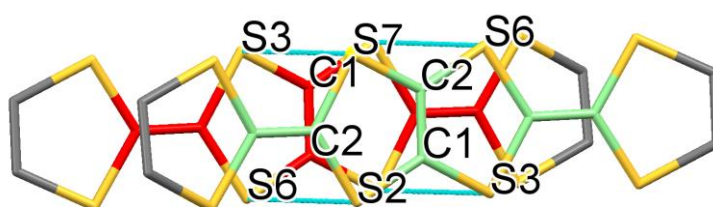

**Figure S6.** Mutual arrangement of the radical cations in the dimer and the designations of central C=C bond in the molecules of the pseudo- $\kappa''$ -(BDH-TTP)<sub>3</sub>(ReO<sub>4</sub>)<sub>2</sub> salt (**3**). Dashed lines show shortened contacts designated as S2...S6 and S3...S7 between the radical cations in the dimer.

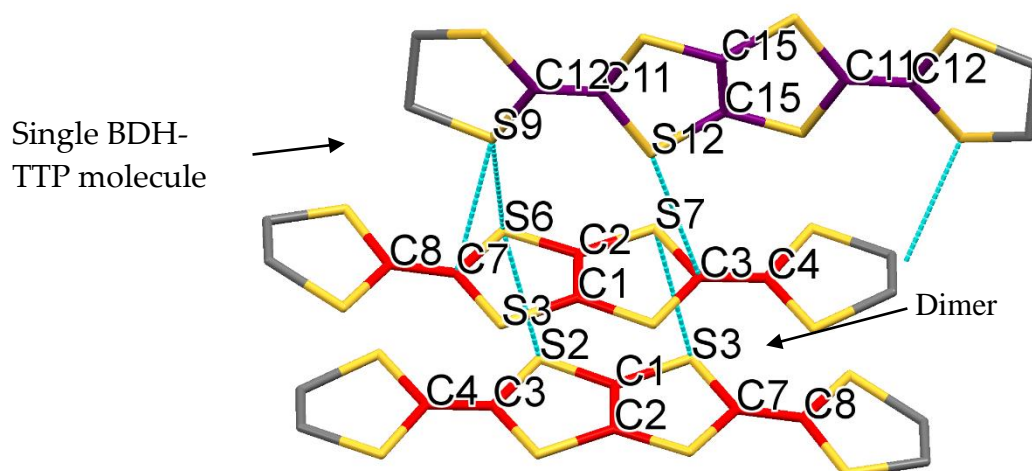

**Figure S7.** The short contacts between the radical cations inside the dimer and between the dimer and single BDH-TTP molecule.

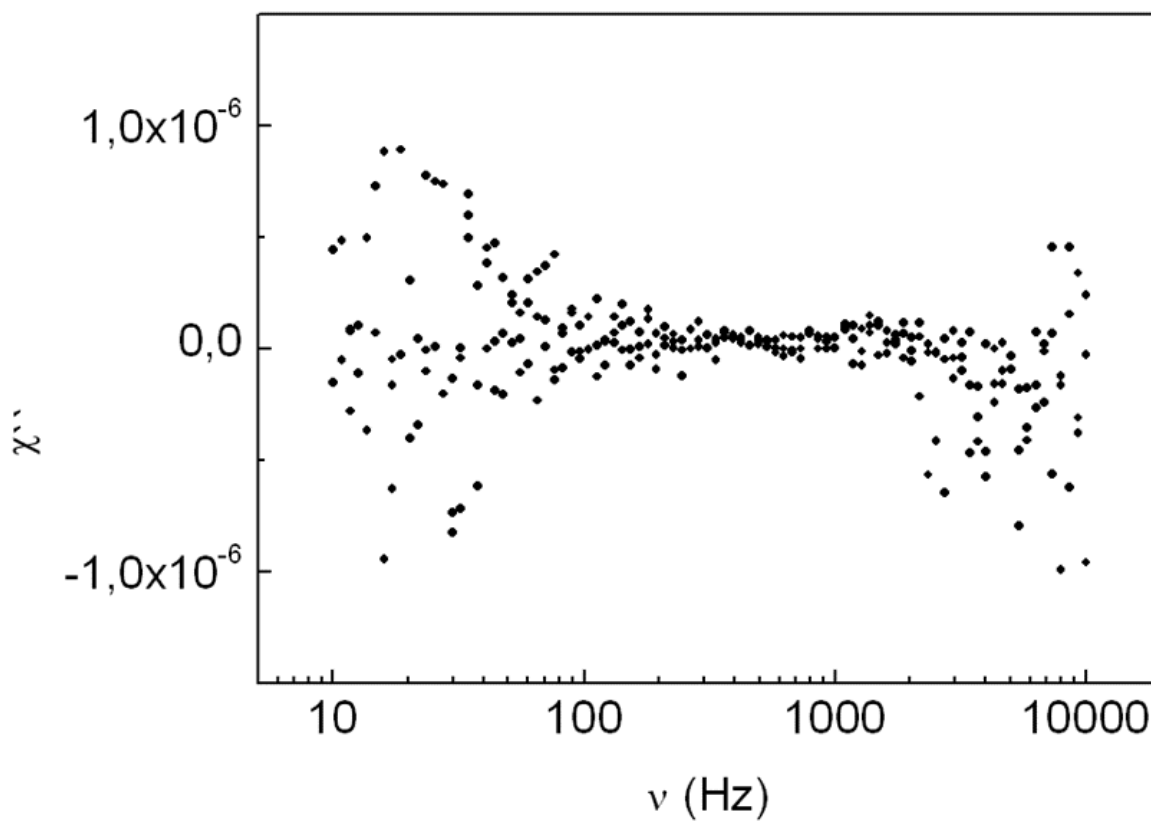

**Figure S8.** Frequency dependences of the out-of phase ( $\chi''$ ) ac susceptibility for  $\kappa$ -(BDH-TTP)<sub>4</sub>ReF<sub>6</sub> salt (**1**) at temperature of 2.0 K in a dc field of 0.4 Tesla

**Table S1.** Crystallographic data and refined structural parameters for the crystals **1-3**

| Identification code                      | 1 salt                                                            | 2 salt                                                                              | 3 salt                                                            |
|------------------------------------------|-------------------------------------------------------------------|-------------------------------------------------------------------------------------|-------------------------------------------------------------------|
| Empirical formula                        | C <sub>40</sub> H <sub>32</sub> F <sub>6</sub> Re S <sub>32</sub> | C <sub>40</sub> H <sub>32</sub> F <sub>6</sub> O <sub>4.80</sub> Re S <sub>32</sub> | C <sub>15</sub> H <sub>12</sub> O <sub>4</sub> Re S <sub>12</sub> |
| Formula weight                           | 1838.78                                                           | 1915.58                                                                             | 827.17                                                            |
| Temperature                              | 150 K                                                             | 150 K                                                                               | 100 K                                                             |
| Wavelength, Å                            | 0.71073                                                           | 0.71073                                                                             | 0.71073                                                           |
| Crystal system, space group              | Monoclinic, P2 <sub>1</sub> /c                                    | Monoclinic, C2/c                                                                    | Triclinic, P/1                                                    |
| a, Å                                     | 20.0098(11)                                                       | 35.837(2)                                                                           | 8.0239(4)                                                         |
| b, Å                                     | 8.0568(4)                                                         | 7.9677(5)                                                                           | 9.3028(5)                                                         |
| c, Å                                     | 10.8367(5)                                                        | 10.8502(7)                                                                          | 17.3930(10)                                                       |
| α, deg.                                  | 90.00                                                             | 90.00                                                                               | 96.935(5)                                                         |
| β, deg.                                  | 92.795(5)                                                         | 99.028(9)                                                                           | 97.999(5)                                                         |
| γ, deg.                                  | 90.00                                                             | 90.00                                                                               | 110.093(5)                                                        |
| Volume, Å <sup>3</sup>                   | 1744.96(15)                                                       | 3059.8(3)                                                                           | 1187.41(11)                                                       |
| Calculated density, Mg/m <sup>3</sup>    | 1.750                                                             | 2.079                                                                               | 2.314                                                             |
| Z                                        | 4                                                                 | 2                                                                                   | 2                                                                 |
| Absorption coefficient, mm <sup>-1</sup> | 2.746                                                             | 3.142                                                                               | 6.210                                                             |
| Crystal size, mm                         | 0.20×0.15×0.07                                                    | 0.25 x 0.20 x 0.10                                                                  | 0.15 x 0.07 x 0.05                                                |
| Theta range for data collection, deg.    | 3.15 to 34.07                                                     | 3.09 to 26.07                                                                       | 2.76 to 29.07                                                     |
| Reflections collected /unique            | 27424 /7158/ [R(int) = 0.0583]                                    | 10393 / 3028 [R(int) = 0.0568]                                                      | 10285 / 6338 [R(int) = 0.0404]                                    |
| Data / restraints / parameters           | 7158 / 7 / 226                                                    | 3028 / 18 / 207                                                                     | 6338 / 44 / 302                                                   |
| GOF                                      | 1.100                                                             | 1.005                                                                               | 1.047                                                             |
| Final R indices [I>2sigma(I)]            | R1 = 0.0929, wR2 = 0.2540                                         | R1 = 0.0702, wR2 = 0.1876                                                           | R1 = 0.0468, wR2 = 0.0958                                         |
| R indices (All data)                     | R1 = 0.1182, wR2 = 0.2699                                         | R1 = 0.0783, wR2 = 0.1947                                                           | R1 = 0.0620, wR2 = 0.1081                                         |

**Table S2.** Bond length of Re=O in a tetrahedron [ReO<sub>4</sub>]<sup>-</sup>

| Bond  | Bond length, Å | Bond   | Bond length, Å |
|-------|----------------|--------|----------------|
| Re-O1 | 1.786(7)       | Re-O'1 | 1.700(9)       |
| Re-O2 | 1.716(6)       | Re-O'2 | 1.730(9)       |
| Re-O3 | 1.732(7)       | Re-O'3 | 1.734(10)      |
| Re-O4 | 1.717(7)       | Re-O4' | 1.771(9)       |
